# Supplementary material
Source: PubMed Central journal article supplement (PMC5055755)
Supplement: NIHMS820107-supplement-SI.pdf [file NIHMS820107-supplement-SI.pdf]

## Supporting Information

Lumiquinone A, an  $\alpha$ -Aminomalonate-Derived Aminobenzoquinone from *Photorhabdus luminescens*

Hyun Bong Park<sup>†,‡</sup> and Jason M. Crawford<sup>\*,†,‡,§</sup>

<sup>†</sup>*Department of Chemistry, Yale University, New Haven, Connecticut 06520, United States*

<sup>‡</sup>*Chemical Biology Institute, Yale University, West Haven, Connecticut 06516, United States*

<sup>§</sup>*Department of Microbial Pathogenesis, Yale School of Medicine, New Haven, Connecticut 06536, United States*

<sup>\*</sup>Corresponding Author: Jason M. Crawford, Ph. D.

Tel: +1 203 737 3966 Fax: +1 203 432 8726

E-mail address: [jason.crawford@yale.edu](mailto:jason.crawford@yale.edu)

| Table of Contents                                                                                                                                    | Page |
|------------------------------------------------------------------------------------------------------------------------------------------------------|------|
| <b>Figure S1.</b> HR-ESI-Q-TOF-MS spectral data of compound <b>1</b> .....                                                                           | S3   |
| <b>Figure S2.</b> UV spectral data of compound <b>1</b> .....                                                                                        | S4   |
| <b>Figure S3.</b> <sup>1</sup> H NMR spectral data of compound <b>1</b> in chloroform- <i>d</i> <sub>1</sub> .....                                   | S5   |
| <b>Figure S4.</b> COSY NMR spectral data of compound <b>1</b> in chloroform- <i>d</i> <sub>1</sub> .....                                             | S6   |
| <b>Figure S5.</b> HSQC NMR spectral data of compound <b>1</b> in chloroform- <i>d</i> <sub>1</sub> .....                                             | S7   |
| <b>Figure S6.</b> HMBC NMR spectral data of compound <b>1</b> in chloroform- <i>d</i> <sub>1</sub> .....                                             | S8   |
| <b>Figure S7.</b> <sup>1</sup> H NMR spectral data of compound <b>2</b> in chloroform- <i>d</i> <sub>1</sub> .....                                   | S9   |
| <b>Figure S8.</b> <sup>13</sup> C NMR chemical shift comparisons of heterosubstituted-1,4-benzoquinone core with those of literature values<br>..... | S10  |
| <b>Figure S9.</b> Paper disk test assay for antimicrobial activities of compounds <b>1</b> and <b>2</b> .....                                        | S11  |
| <b>Figure S10.</b> The incorporation of [2- <sup>13</sup> C]malonate into compounds <b>1</b> (A) and <b>2</b> (B) .....                              | S12  |

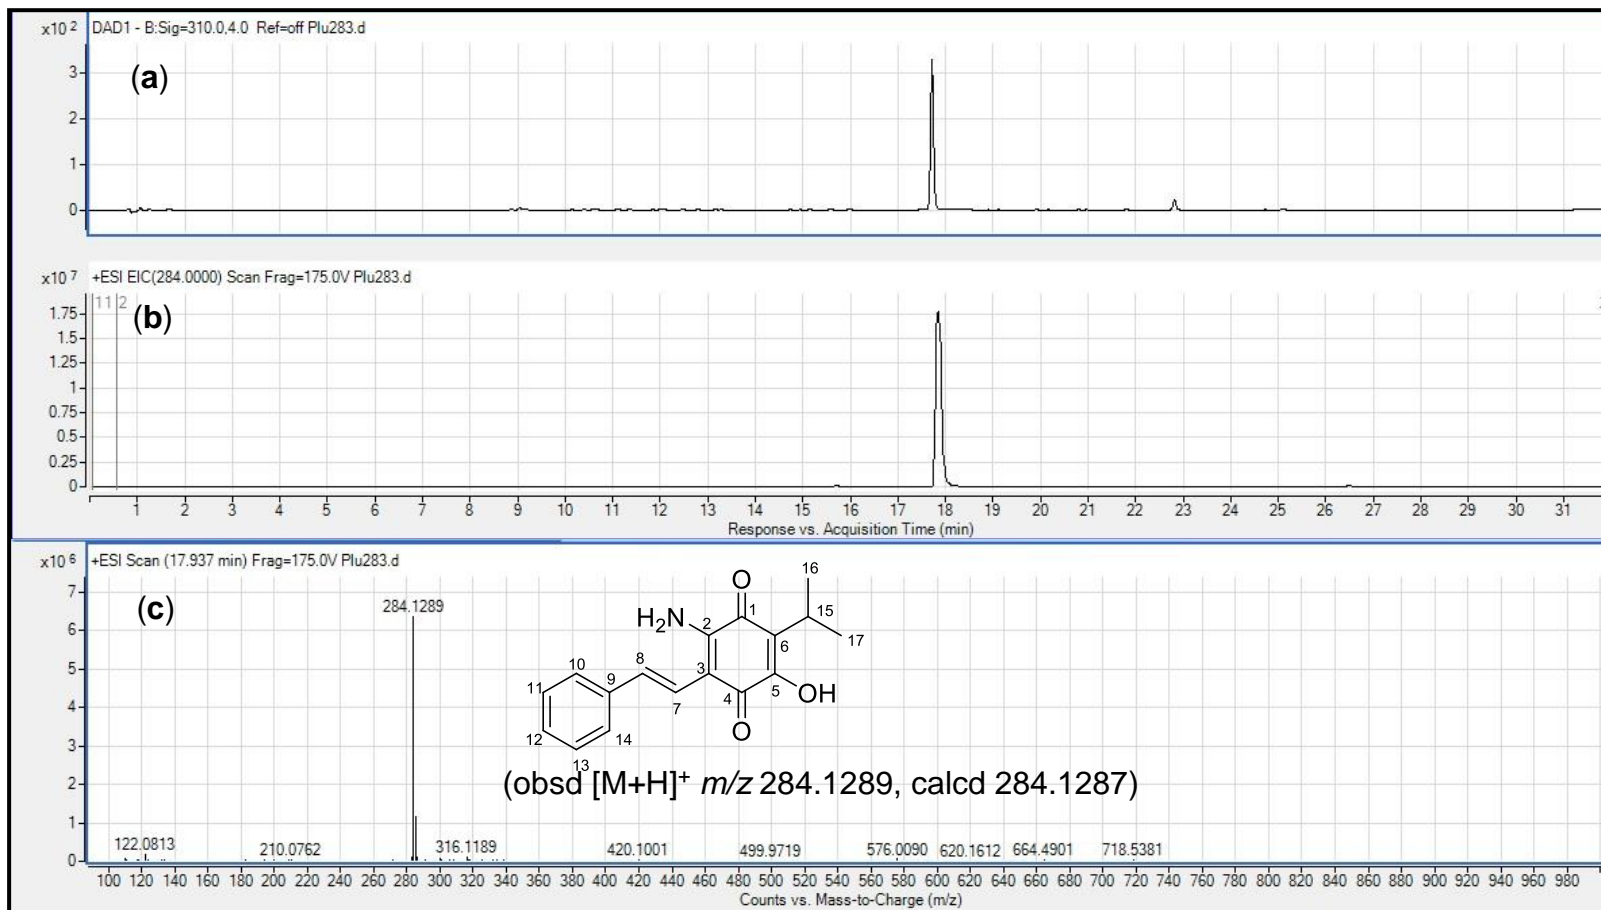

**Figure S1.** HR-ESI-Q-TOF-MS spectral data of compound 1 (a) HPLC chromatogram of 1 detected by UV 310 nm (b) Extracted ion chromatogram of  $m/z$  284 for compound 1 (c) MS profiles of compound 1

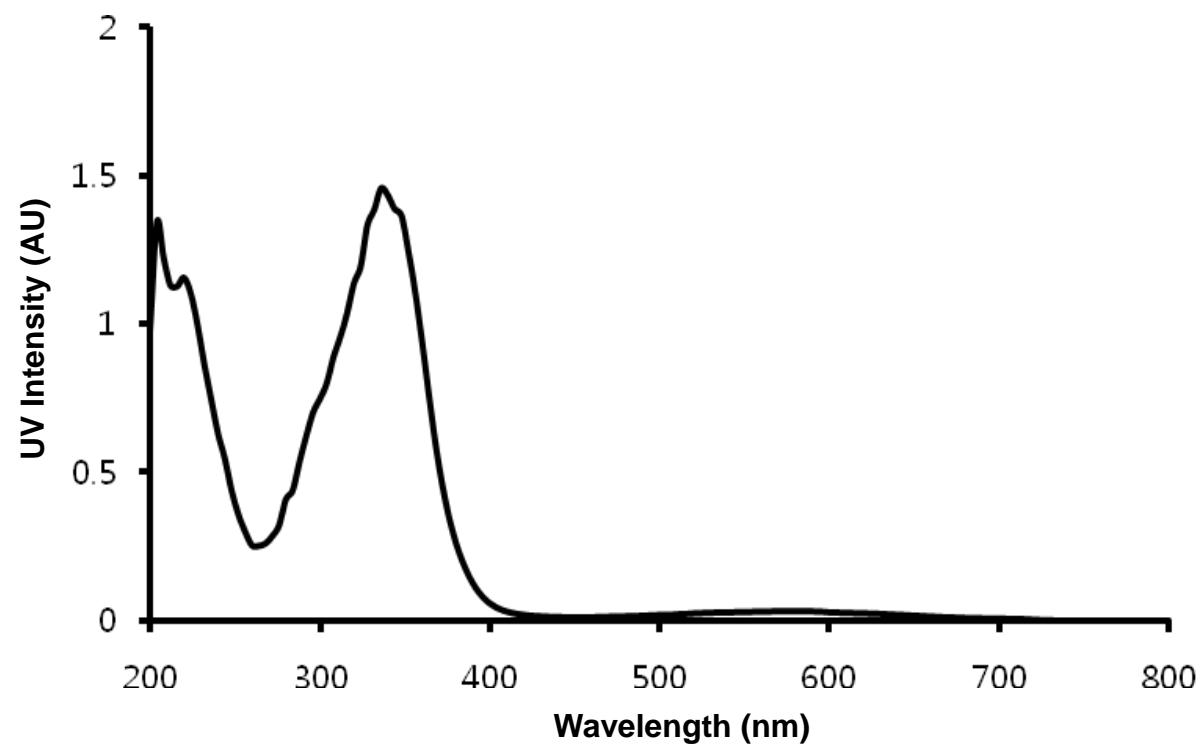

**Figure S2.** UV spectral data of compound 1 ( $1.5 \times 10^4$  M in methanol)

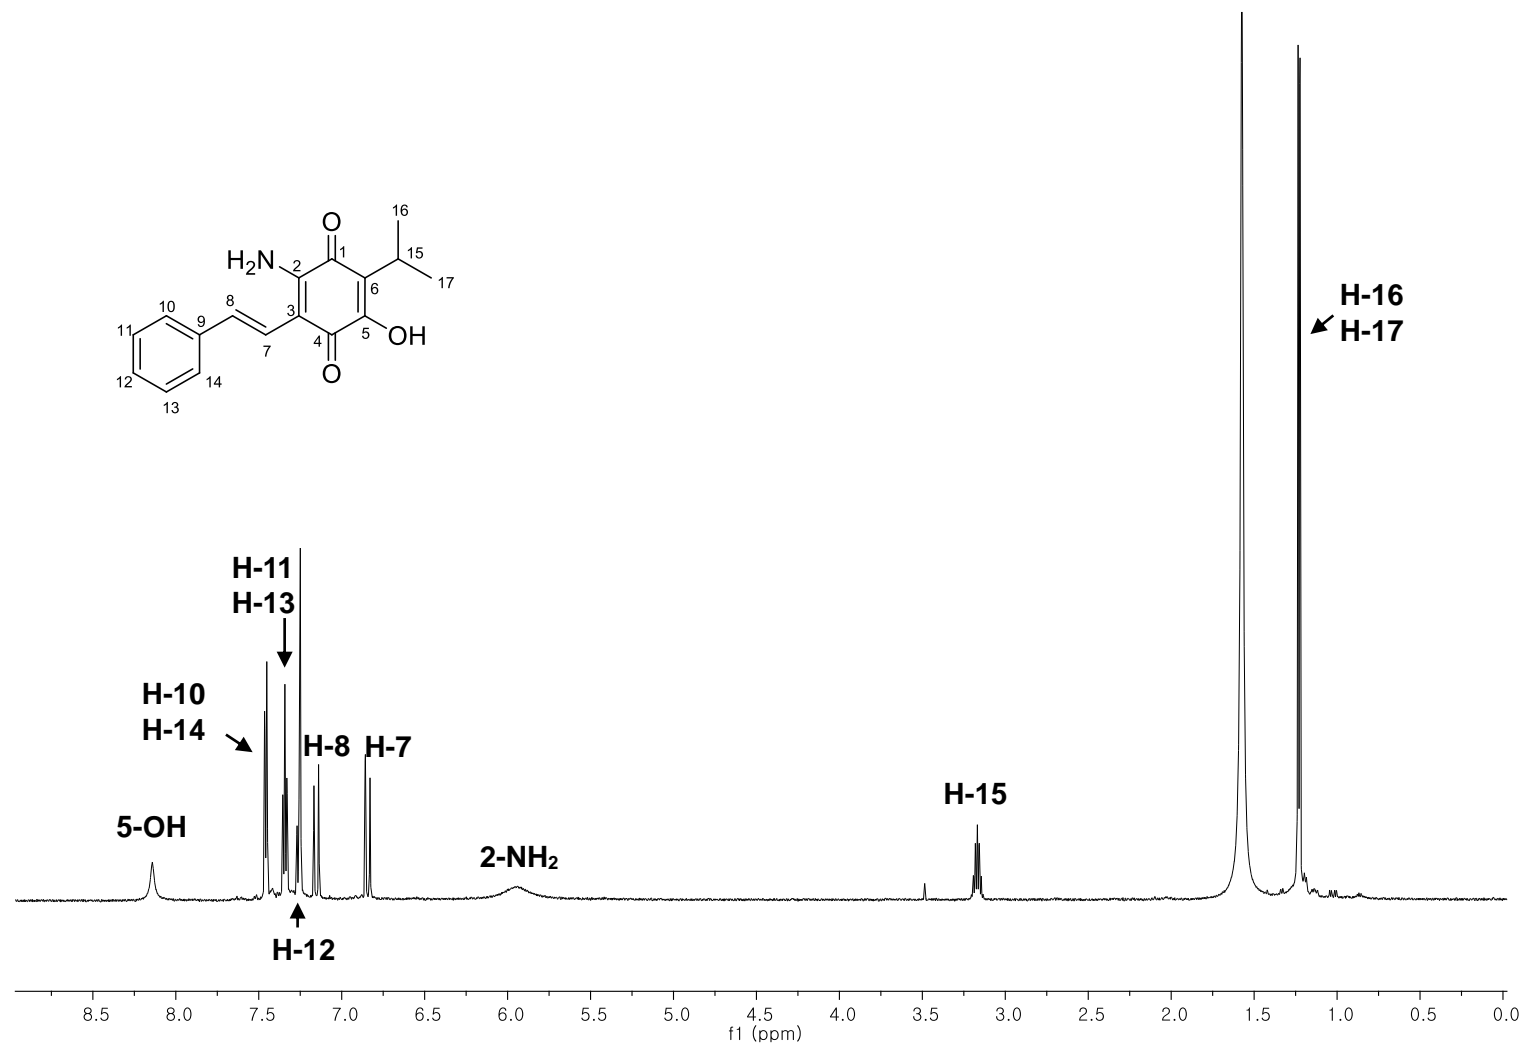

**Figure S3.** <sup>1</sup>H NMR spectral data of compound 1 in chloroform-*d*<sub>1</sub>

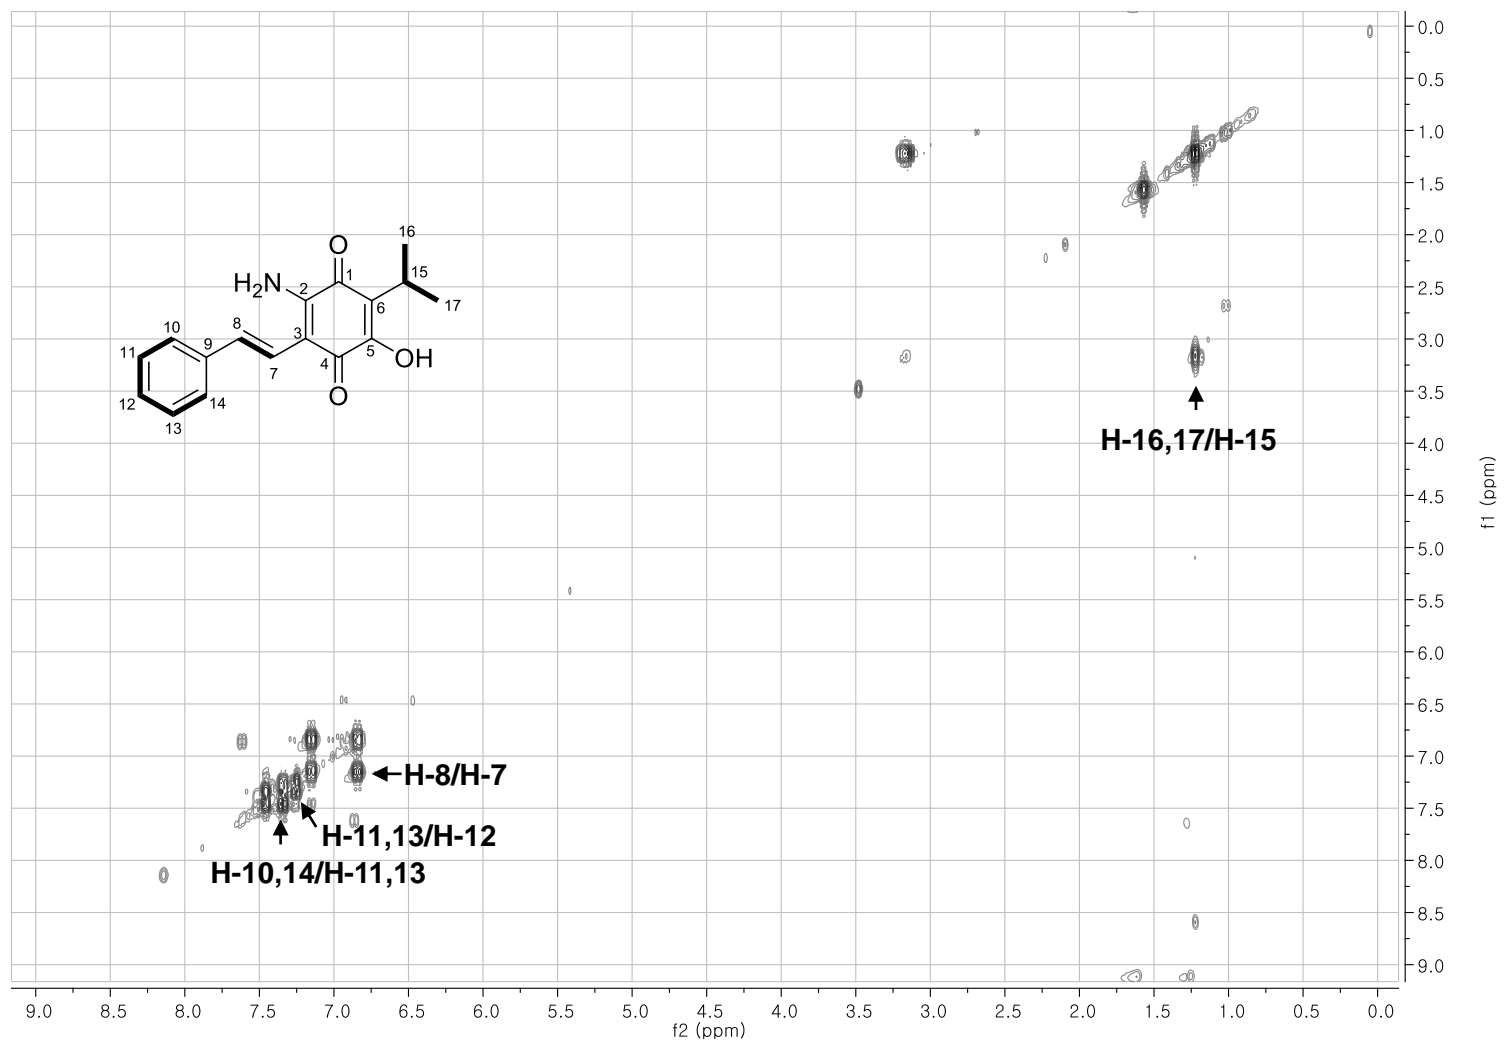

**Figure S4.** COSY NMR spectral data of compound **1** in chloroform- $d_1$

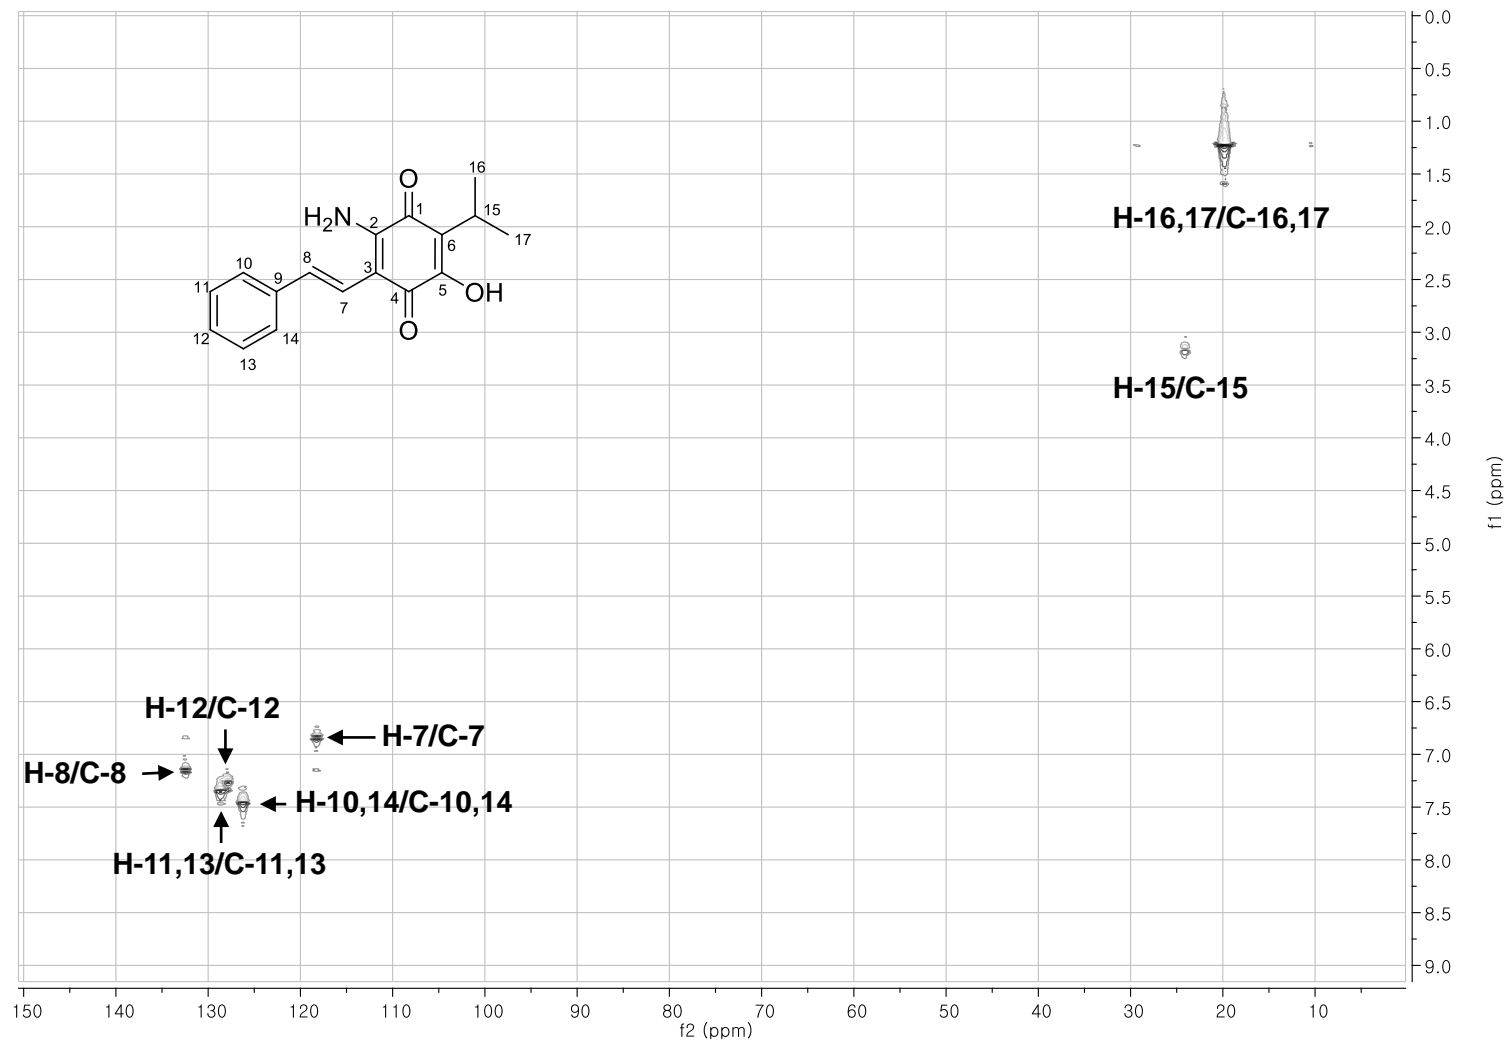

**Figure S5.** HSQC NMR spectral data of compound **1** in chloroform-*d*<sub>1</sub>

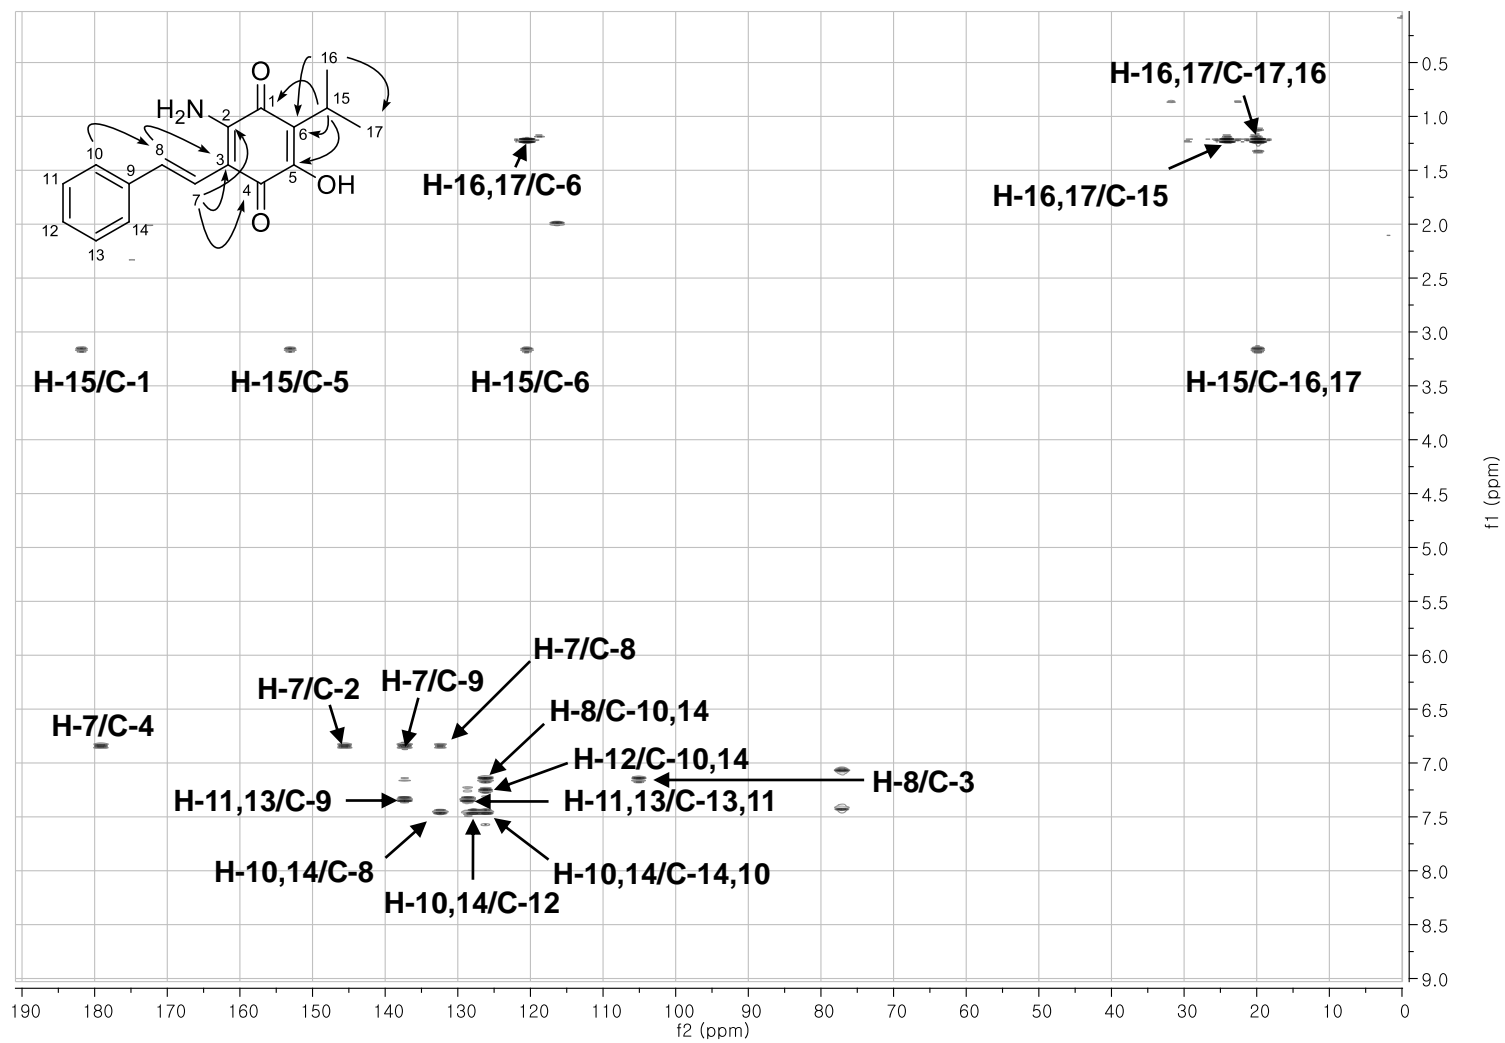

**Figure S6.** HMBC NMR spectral data of compound **1** in chloroform- $d_1$



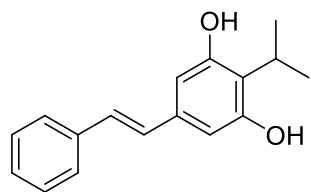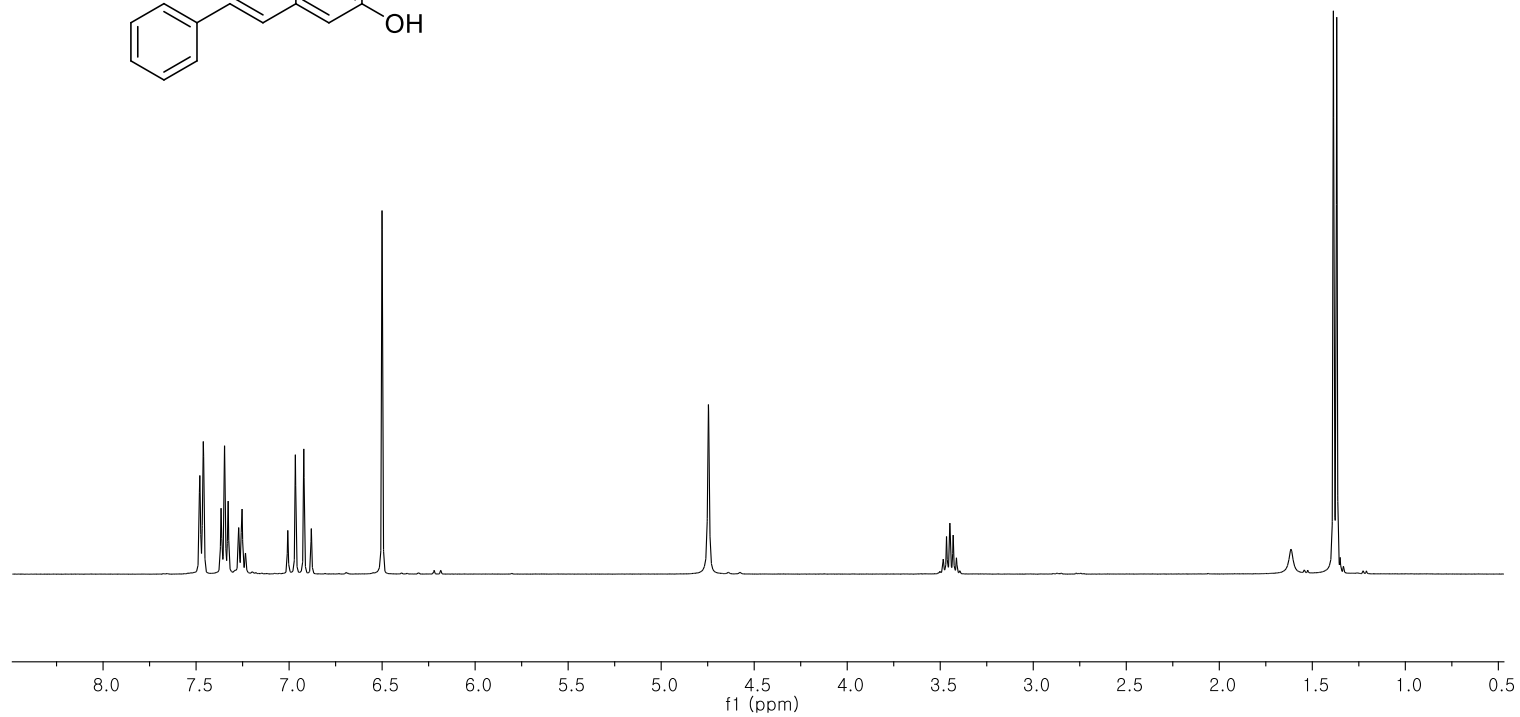

**Figure S7.**  $^1\text{H}$  NMR spectral data of compound 2 in chloroform- $d_1$

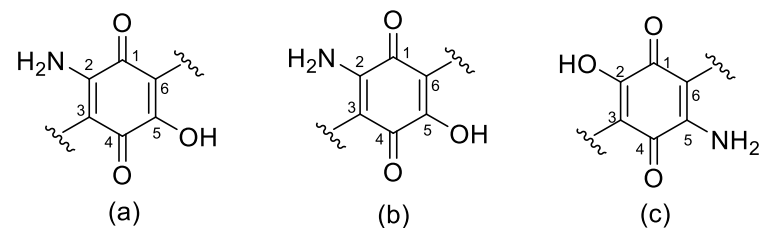

| Position | (a)   | (b)   | (c)   |
|----------|-------|-------|-------|
| 1        | 181.8 | 182.5 | 179.3 |
| 2        | 145.6 | 146.6 | 153.5 |
| 3        | 105.1 | 103.4 | 110.5 |
| 4        | 179.1 | 179.8 | 183.3 |
| 5        | 153.1 | 153.4 | 146.0 |
| 6        | 120.5 | 118.5 | 111.1 |

**Figure S8.**  $^{13}\text{C}$  NMR chemical shift comparisons of heterosubstituted-1,4-benzoquinone core with those of literature values (a) carbon chemical shift of 2-amino-5-hydroxy-1,4-benzoquinone core of lumiquinone A (**1**) (b) carbon chemical shift of 2-amino-5-hydroxy-1,4-benzoquinone core described in the literature (c) carbon chemical shifts of 2-hydroxy-5-amino-1,4-benzoquinone core described in the literature (See reference 17)

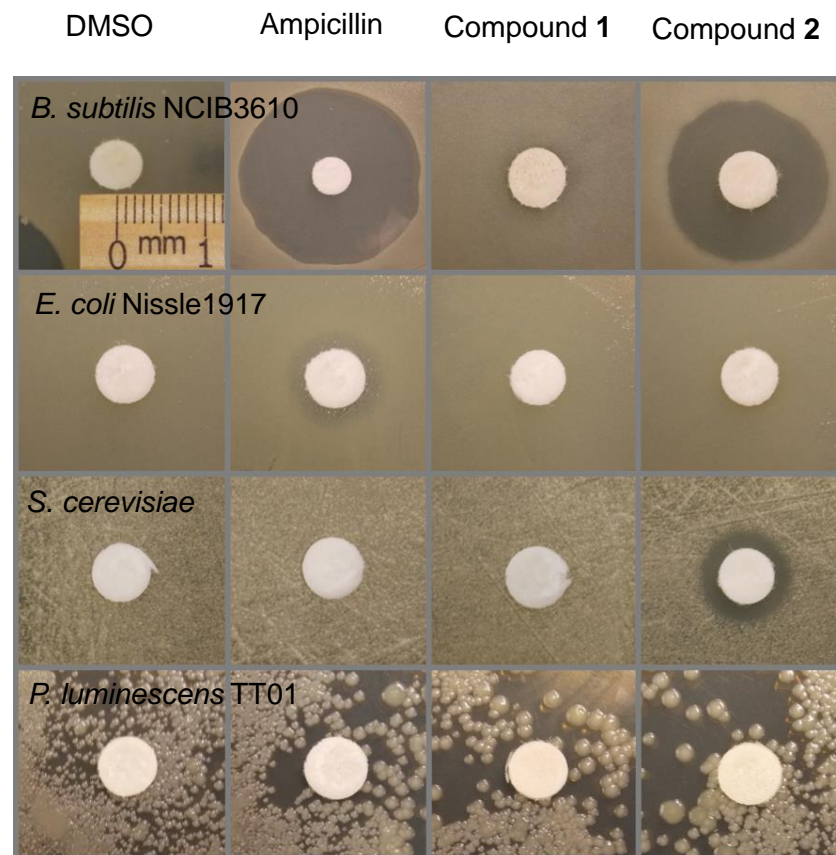

**Figure S9.** Paper disk test assay for antimicrobial activities of compounds **1** and **2**

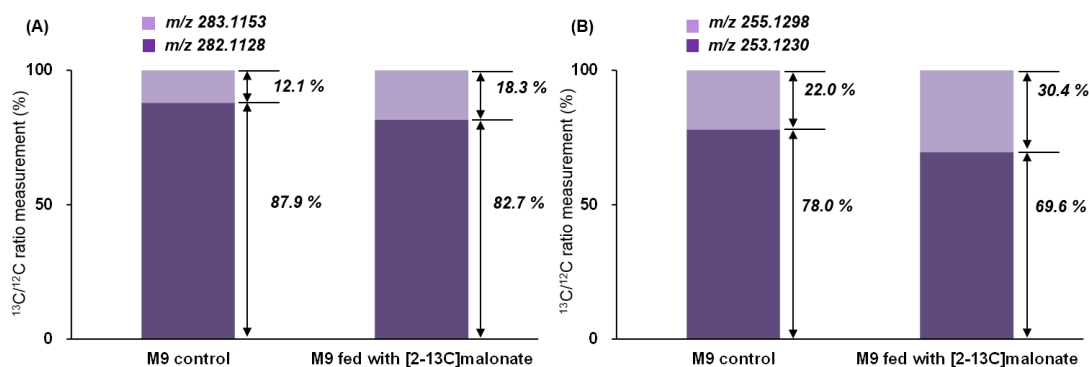

**Figure 10.** The incorporation of [2-<sup>13</sup>C]malonate into compounds **1** (A) and **2** (B). The observed  $m/z$  282.1128 and  $m/z$  253.1230 peaks correspond to deprotonated molecular ions of **1** and **2** in the negative ion mode, respectively. The <sup>13</sup>C peak integration ratio measured by the [2-<sup>13</sup>C]malonate feeding experiment showed a 6.2 percent increase for the singly labeled compound **1** (A) and a 8.4 percent increase for the doubly labeled compound **2** (B) when compared with non-labeled control. The percentage was determined by integration values of extracted peaks within 5 ppm mass error.

#### Feeding experiment with [2-<sup>13</sup>C]malonate in *Photorhabdus luminescens* TT01

[2-<sup>13</sup>C]malonate was purchased from Sigma-Aldrich. *Photorhabdus luminescens* TT01 was grown on 5 mL M9 minimal media supplemented with casamino acids (5 g/L) at 30 °C until OD<sub>600</sub> was between 0.5-0.6. [2-<sup>13</sup>C]malonate (100 mM final concentration) adjusted to pH 7.0 was then fed to the culture broth and cultivated at 30 °C in a shaking incubator (250 rpm). After 72 h, the whole culture broth was extracted with ethyl acetate (2 × 5 mL) and dried under reduced pressure. The crude extracts were analyzed by high-resolution ESI-Q-TOF-MS instrument (Column; Phenomenex kinetics C<sub>18</sub> column, 250 × 4.6 mm, 5 μm, Flow rate; 0.3 mL/min, method; 60 min gradient elution from 10% aqueous acetonitrile to 100% acetonitrile).
